# Supplementary material
Source: PubMed Central journal article supplement (PMC4611955)
Supplement: i1552-5783-56-11-6701-s02.pdf [file i1552-5783-56-11-6701-s02.pdf]

### INEXPERIENCED OBSERVER

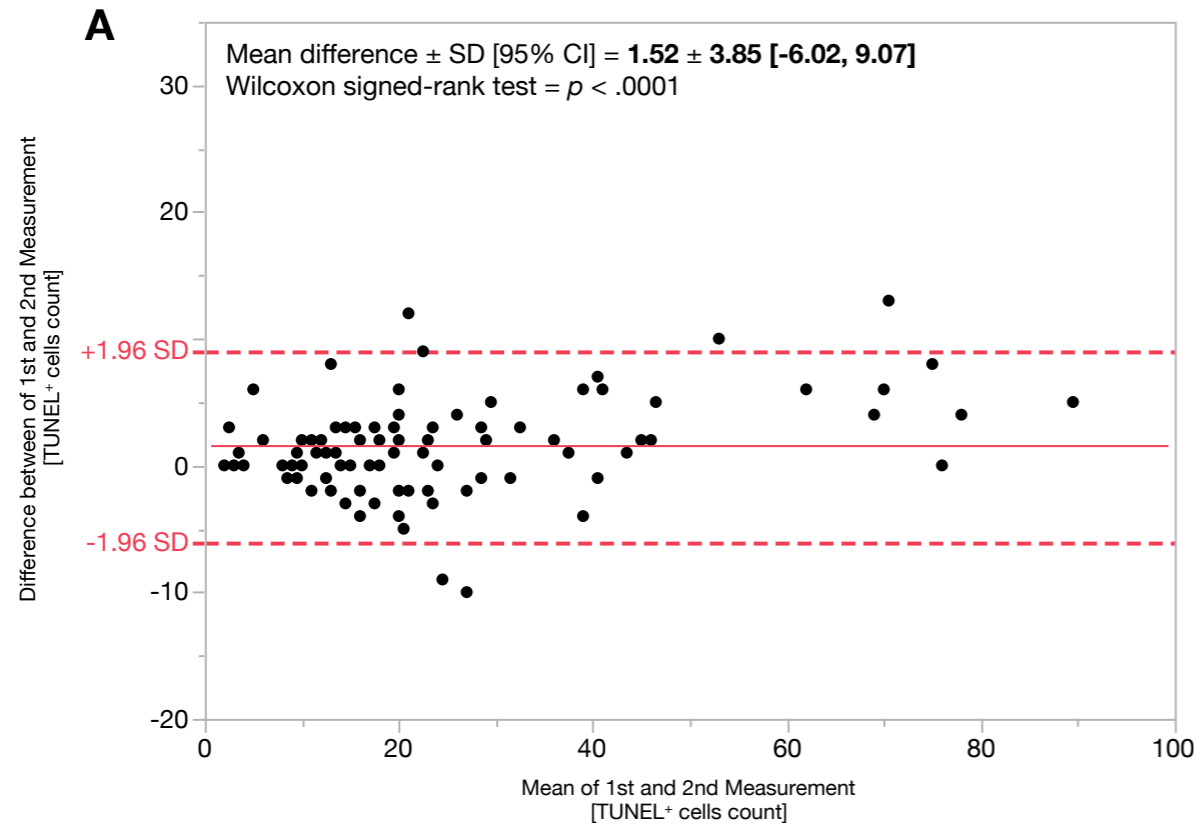

### EXPERIENCED OBSERVER

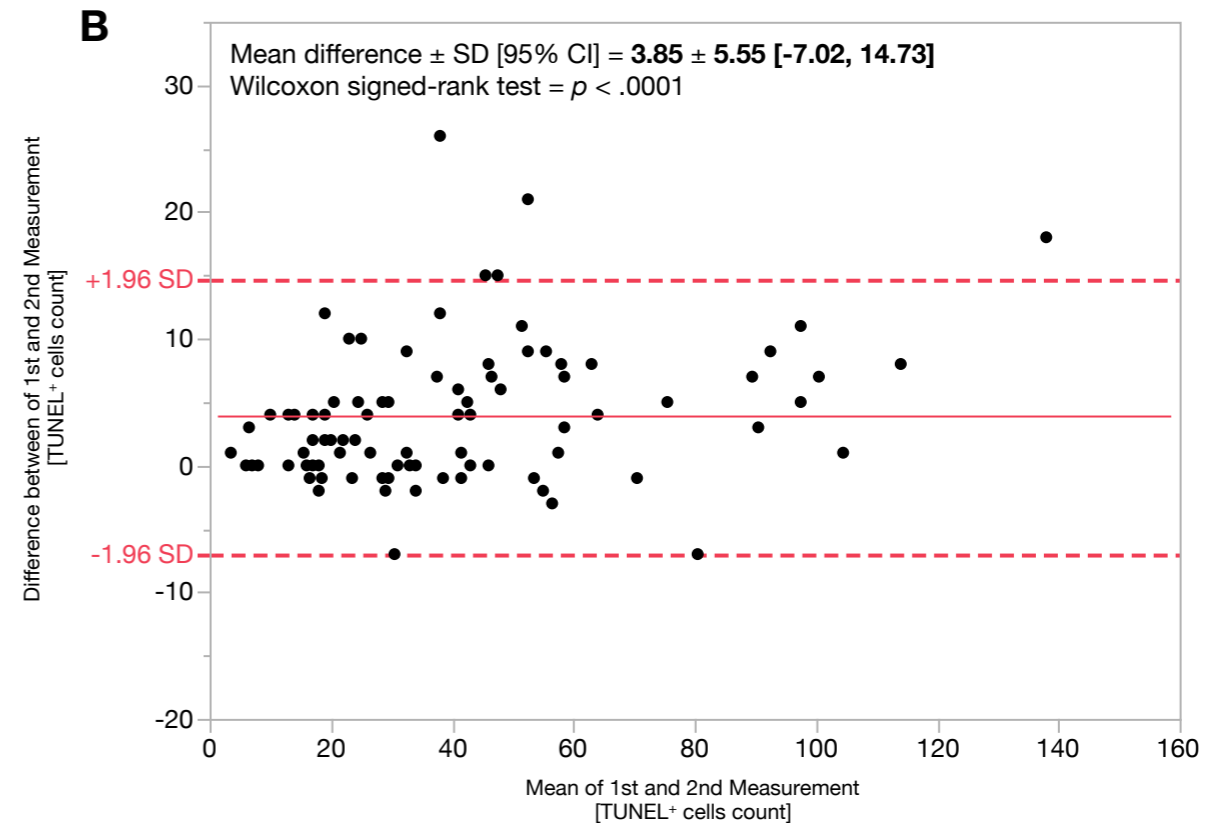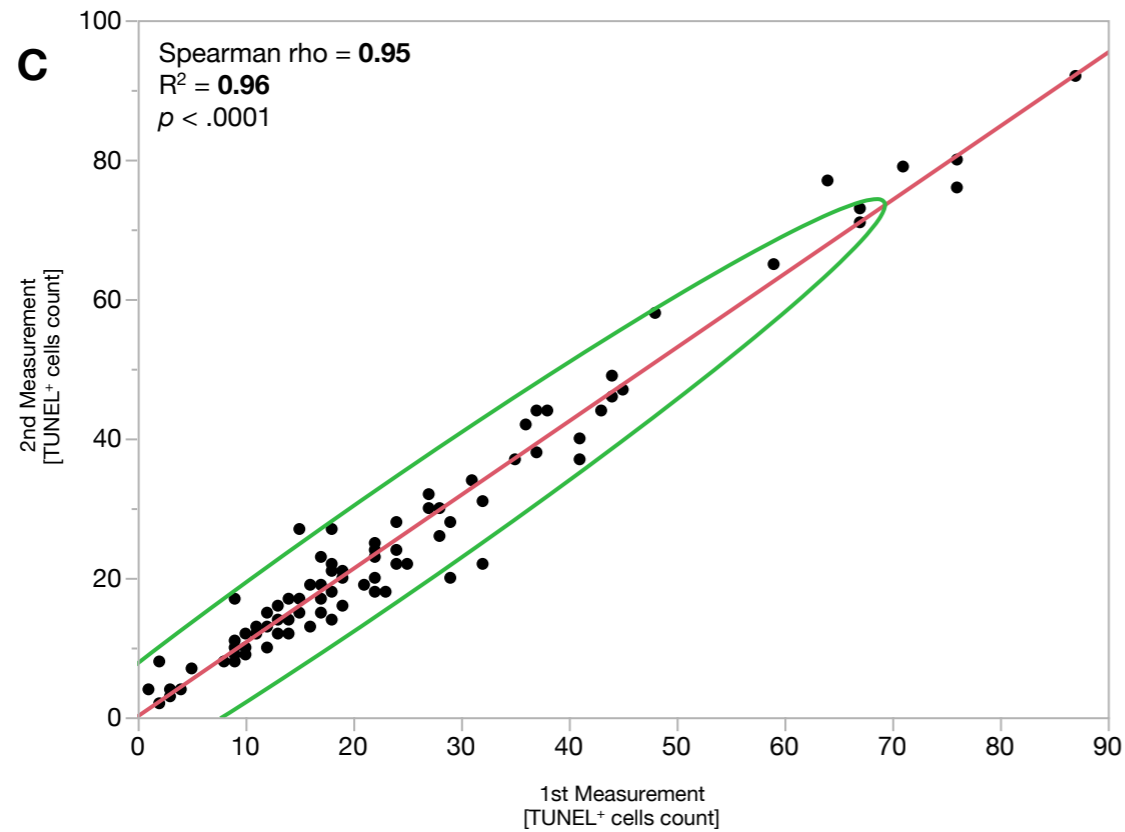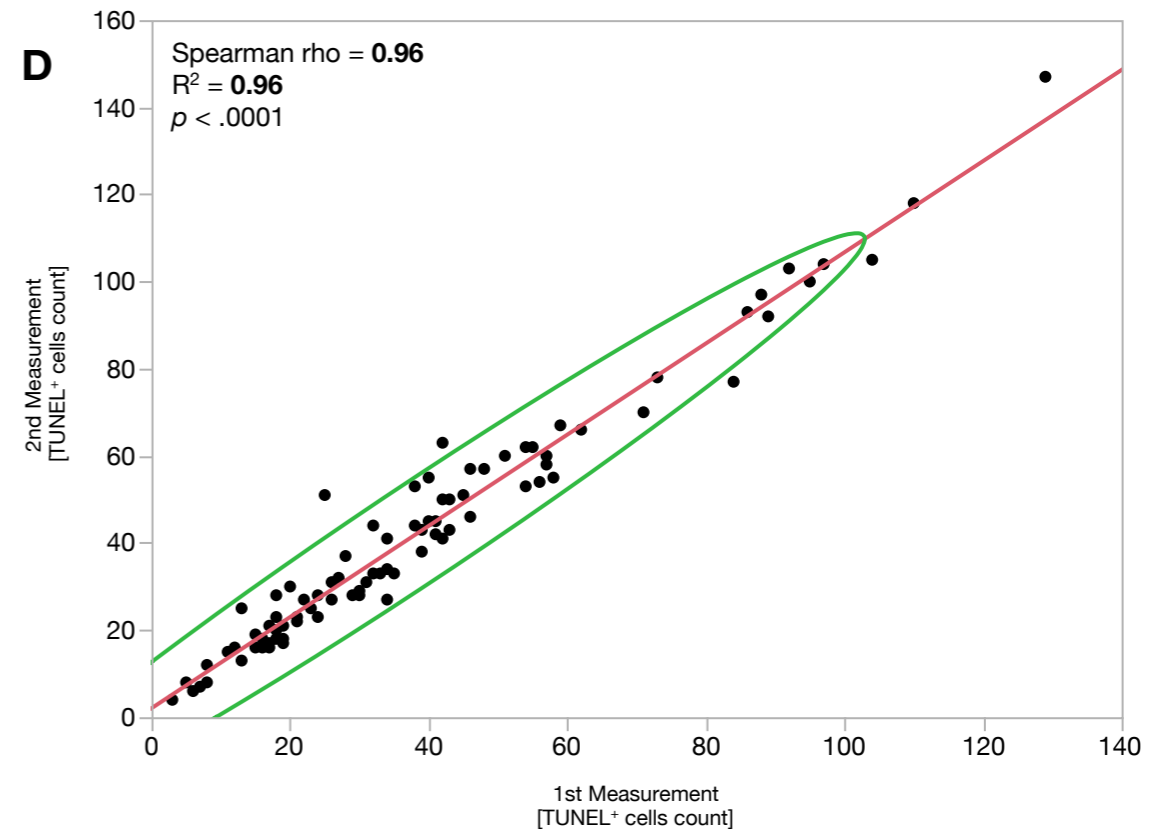

1 **Supplementary Figure 2. Outer Nuclear Layer (ONL) Intra-observer Agreement and Correlation.**

2 Bland-Altman plots for agreement analysis between the first and second ONL measurements of the inexperienced  
3 (A) and experienced observer (B). Red lines represent the mean difference or bias. Red dashed-lines represent the  
4 95% limit of agreement ( $\pm 1.96$  standard deviation (SD)). Correlation analysis between first and second  
5 measurements of inexperienced (C) and experienced observer (D). Red lines represent the fitted linear regression  
6 trendline. Green lines represent the 95% confidence interval area.
