# Supplementary material
Source: PubMed Central journal article supplement (PMC4611955)
Supplement: i1552-5783-56-11-6701-s03.pdf [file i1552-5783-56-11-6701-s03.pdf]

### INEXPERIENCED OBSERVER

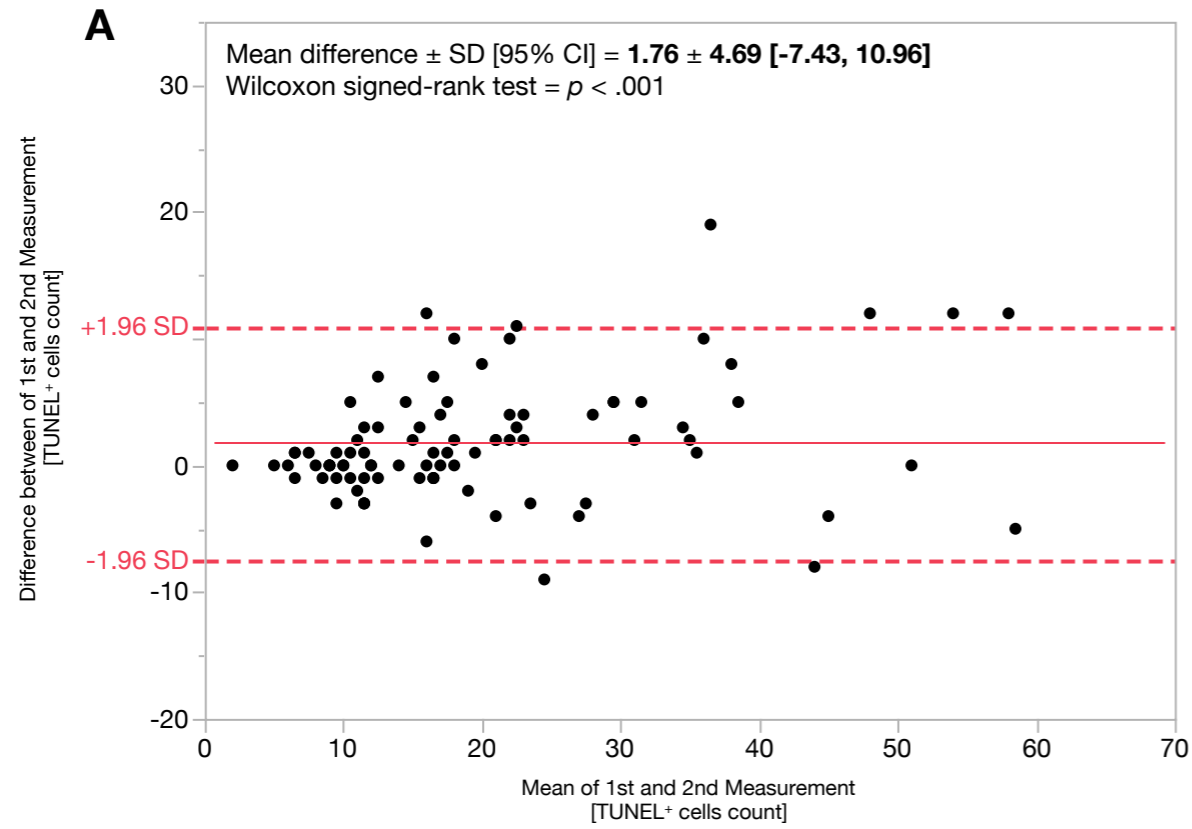

### EXPERIENCED OBSERVER

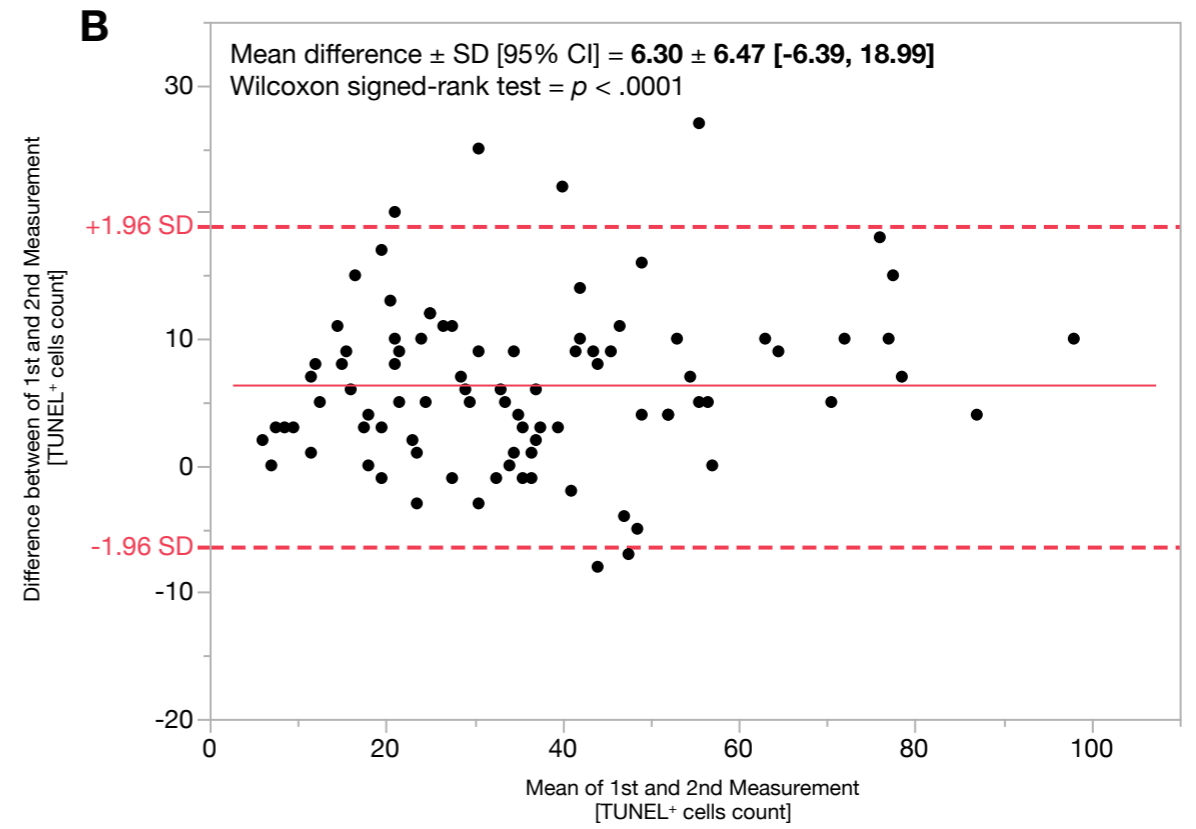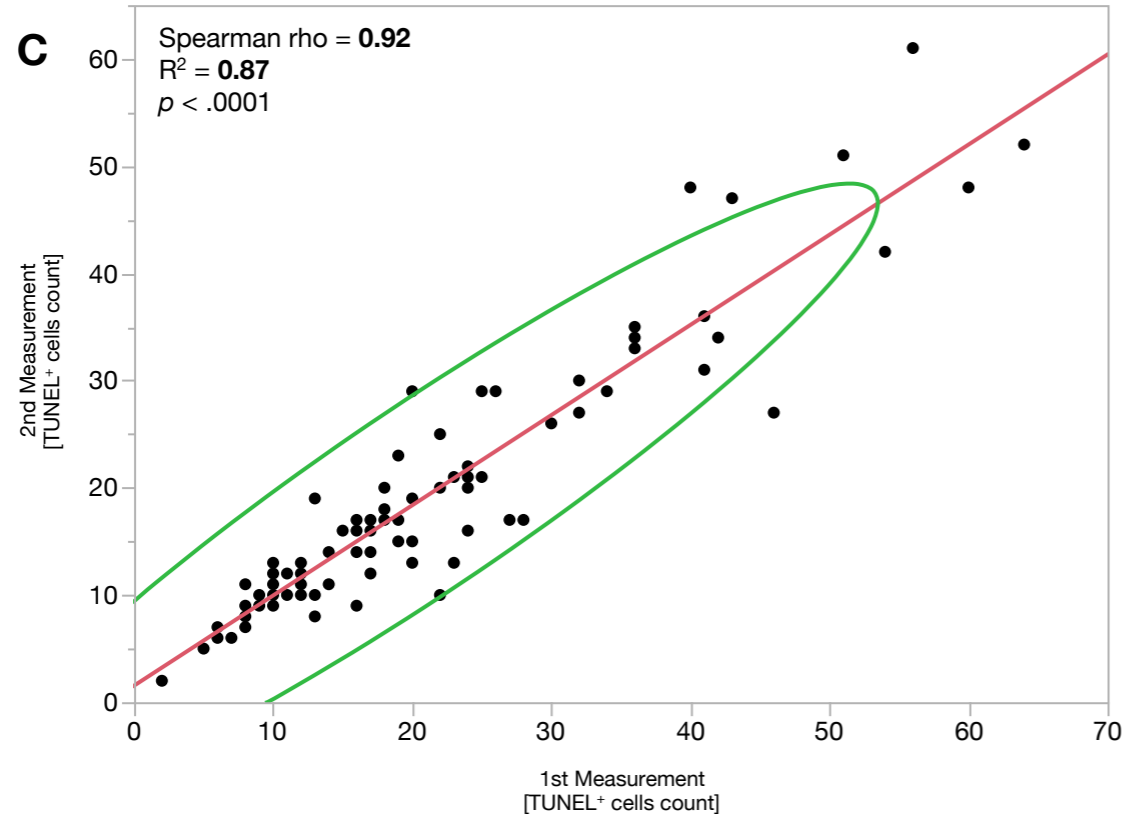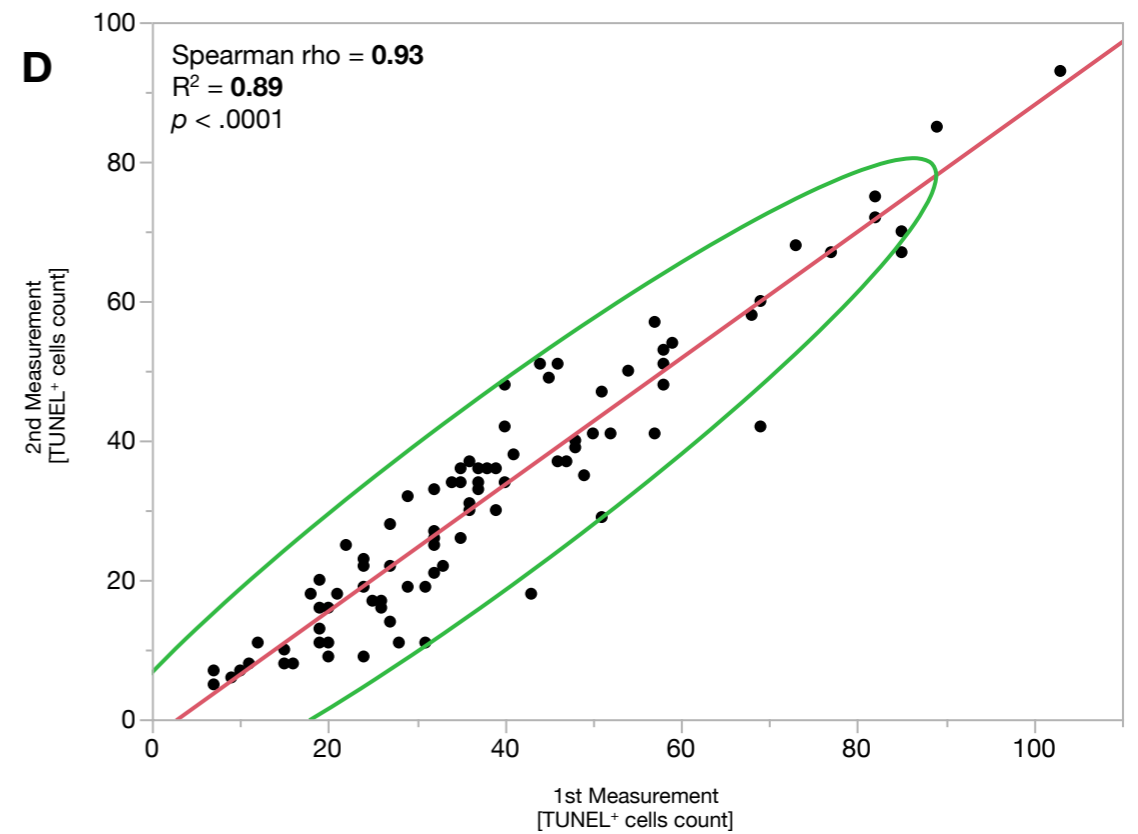

**1    Supplementary Figure 3. Inner Nuclear Layer (INL) Intra-observer Agreement and Correlation.**

2    Bland-Altman plots for agreement analysis between the first and second INL measurements of the inexperienced (A)  
3    and experienced observer (B). Red lines represent the mean difference or bias. Red dashed-lines represent the 95%  
4    limit of agreement ( $\pm 1.96$  standard deviation (SD)). Correlation analysis between first and second measurements of  
5    inexperienced (C) and experienced observer (D). Red lines represent the fitted linear regression trendline. Green  
6    lines represent the 95% confidence interval area.
