# Supplementary material
Source: PubMed Central journal article supplement (PMC4611955)
Supplement: i1552-5783-56-11-6701-s04.pdf [file i1552-5783-56-11-6701-s04.pdf]

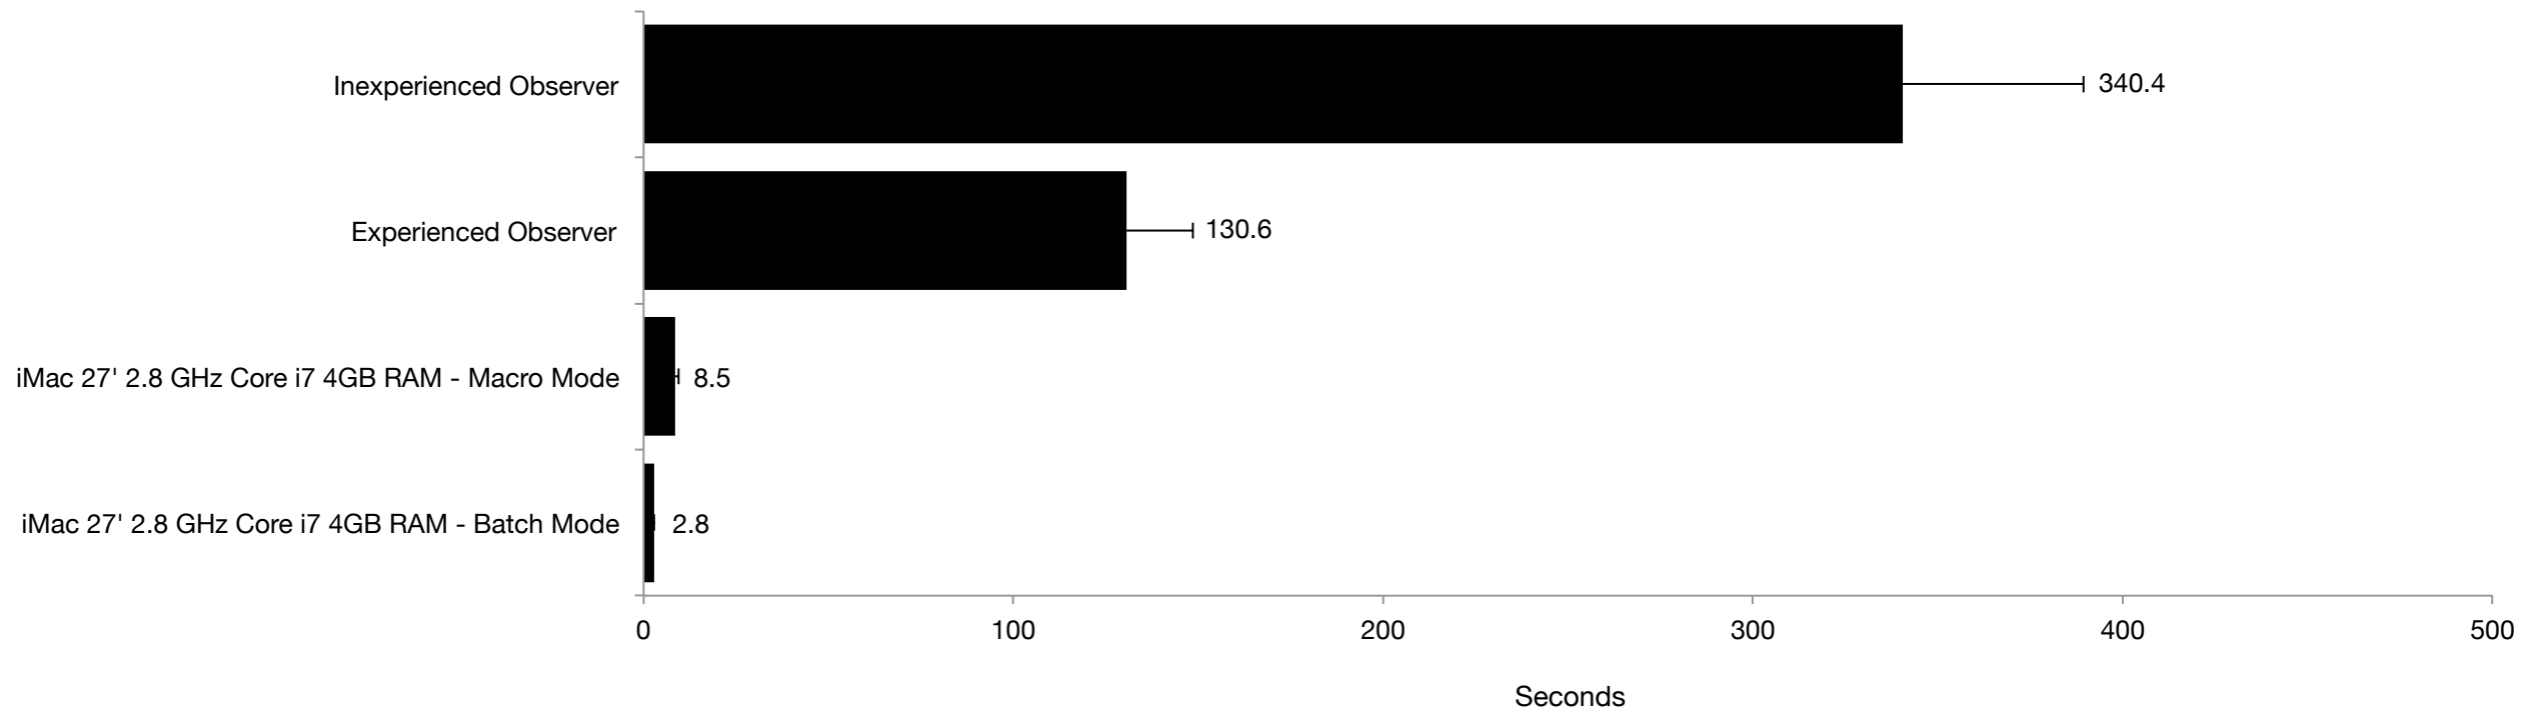

- 1 **Supplementary Figure 4. Burden Time per Image Comparison Between Observers and Macro.**
- 2 Total burden time per image represents the required time for ONL and INL segmentation and TUNEL<sup>+</sup> cells
- 3 counting.
