# Supplementary material
Source: PubMed Central journal article supplement (PMC4611955)
Supplement: i1552-5783-56-11-6701-s05.pdf [file i1552-5783-56-11-6701-s05.pdf]

1 **Supplementary Material**

2 **Supplementary Table 1. Intra- and inter-observer agreement and correlation.**

3 Statistical comparison of TUNEL+ cell counts between observers and ImageJ macro.

|                                    | Intra-Observer Agreement and Correlation                                  |                                                                         | Inter-Observer Agreement and Correlation  |                                          |
|------------------------------------|---------------------------------------------------------------------------|-------------------------------------------------------------------------|-------------------------------------------|------------------------------------------|
|                                    | Inexperienced Observer<br>1 <sup>st</sup> vs. 2 <sup>nd</sup> Measurement | Experienced Observer<br>1 <sup>st</sup> vs. 2 <sup>nd</sup> Measurement | Inexperienced vs.<br>Experienced Observer | Average of Observers vs.<br>ImageJ Macro |
| <b>Outer Nuclear Layer</b>         |                                                                           |                                                                         |                                           |                                          |
| Wilcoxon signed rank test          | < .001                                                                    | < .0001                                                                 | < .0001                                   | .826                                     |
| Spearman correlation               | .95                                                                       | .96                                                                     | .90                                       | .90                                      |
| Mean Difference or Bias<br>(count) | 1.52 ± 3.85                                                               | 3.85 ± 5.55                                                             | 15.56 ± 11.51                             | 0.37 ± 9.78                              |
| Coefficient of Variation (%)       | 15.21 ± 19.69                                                             | 13.09 ± 13.84                                                           | 51.11 ± 25.83                             | 23.37 ± 15.97                            |
| <b>Inner Nuclear Layer</b>         |                                                                           |                                                                         |                                           |                                          |
| Wilcoxon signed rank test          | < .001                                                                    | < .0001                                                                 | < .0001                                   | < .001                                   |
| Spearman correlation               | .92                                                                       | .93                                                                     | .89                                       | .86                                      |
| Mean Difference or Bias<br>(count) | 1.76 ± 4.69                                                               | 6.30 ± 6.47                                                             | 16.00 ± 10.03                             | 2.72 ± 7.26                              |
| Coefficient of Variation (%)       | 16.41 ± 15.39                                                             | 25.20 ± 21.82                                                           | 56.07 ± 24.03                             | 23.44 ± 18.56                            |

4
